# Supplementary material for: Integration of microseism, wavemeter buoy, HF Radar and hindcast data to analyze the Mediterranean cyclone Helios
Source: Copernicus journal article supplement (doi:10.5194/egusphere-2023-1212), 2023-06-19
Supplement: Supplementary file 1 [file egusphere-2023-1212-supplement.pdf]

1

2 **Supplementary figures**

3

4

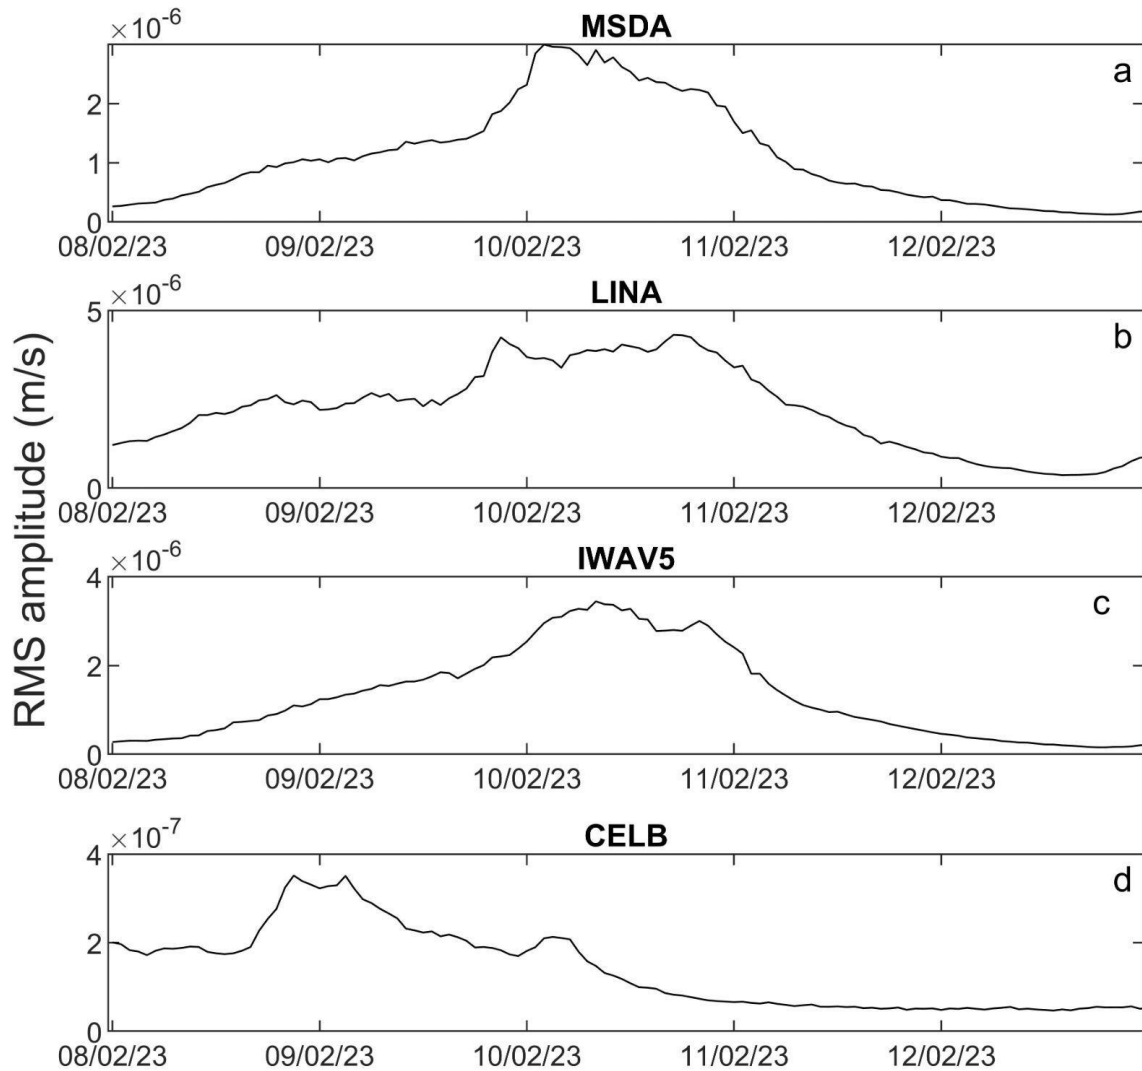

5

6 **Supplementary Figure 1:** RMS amplitude time series, for the SPSM band (0.2-0.4 Hz), of the  
7 seismic signal recorded by the vertical component of 4 stations located along the Maltese  
8 coastline (a), in Linosa Island (b), in the southern part of Sicily (c) and in Central Italy (d) (see  
9 **Figure 2a** for the station locations).

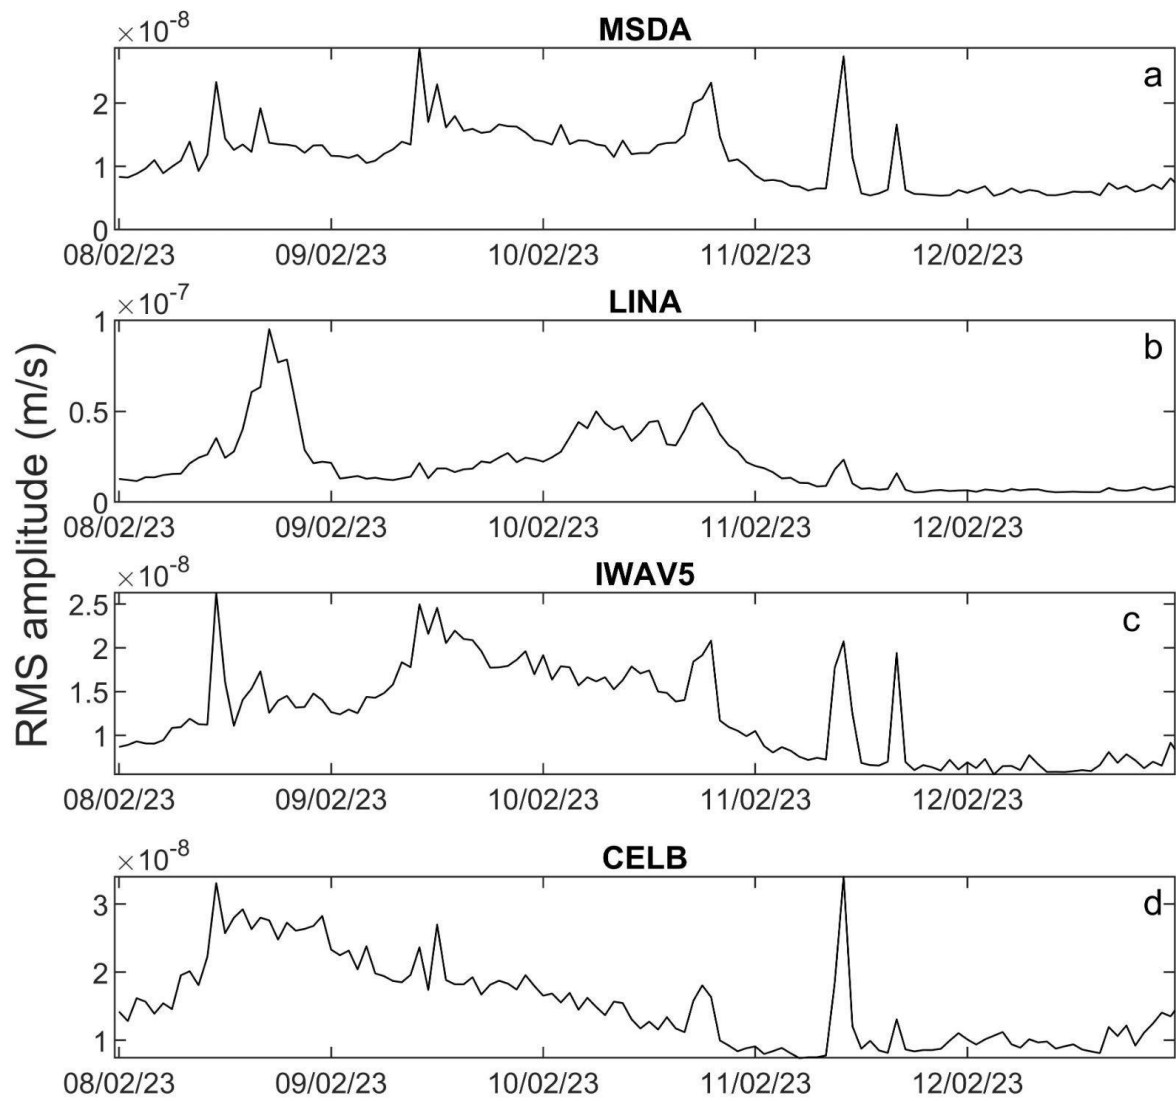

10

11 **Supplementary Figure 2:** RMS amplitude time series, for the PM band (0.05-0.07 Hz), of the  
 12 seismic signal recorded by the vertical component of 4 stations located along the Maltese  
 13 coastline (a), in Linosa Island (b), in the southern part of Sicily (c) and in Central Italy (d) (see  
 14 **Figure 2a** for the station locations).

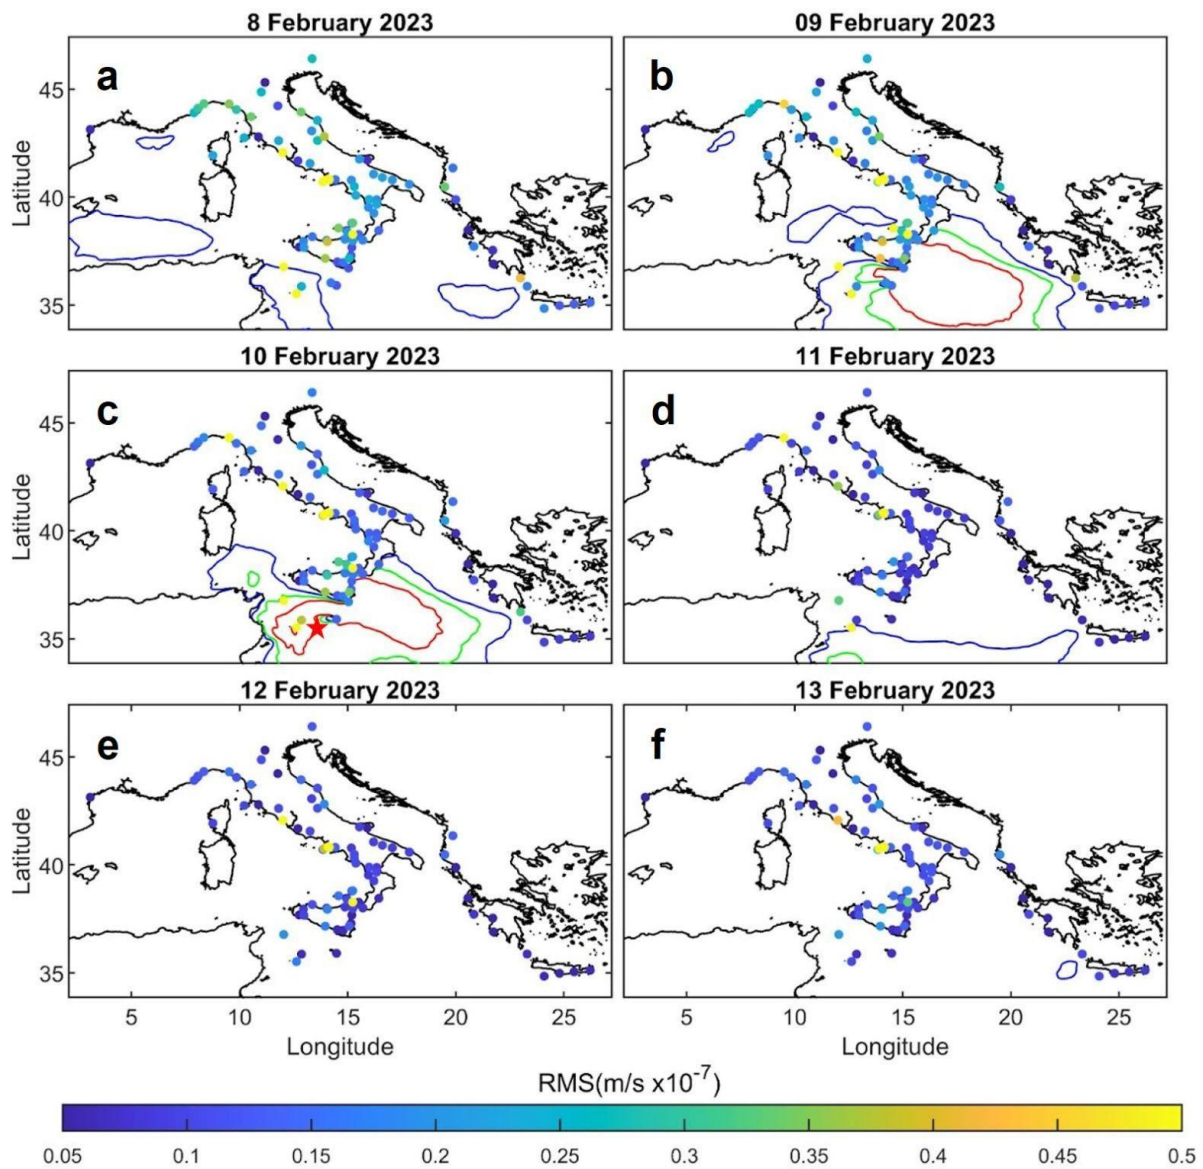

15

16 **Supplementary Figure 3:** Spatial and temporal distribution of the RMS amplitude for the PM  
 17 band computed at 105 stations considered (dots). The colors of dots represent the RMS  
 18 amplitude as specified in the color bar. The blue, green and red contour lines represent  
 19 significant wave heights of 3, 4 and 5 m, respectively, while the red five-point star in (c)  
 20 indicates the eye position of the sub-tropical system Helios obtained from satellite images.

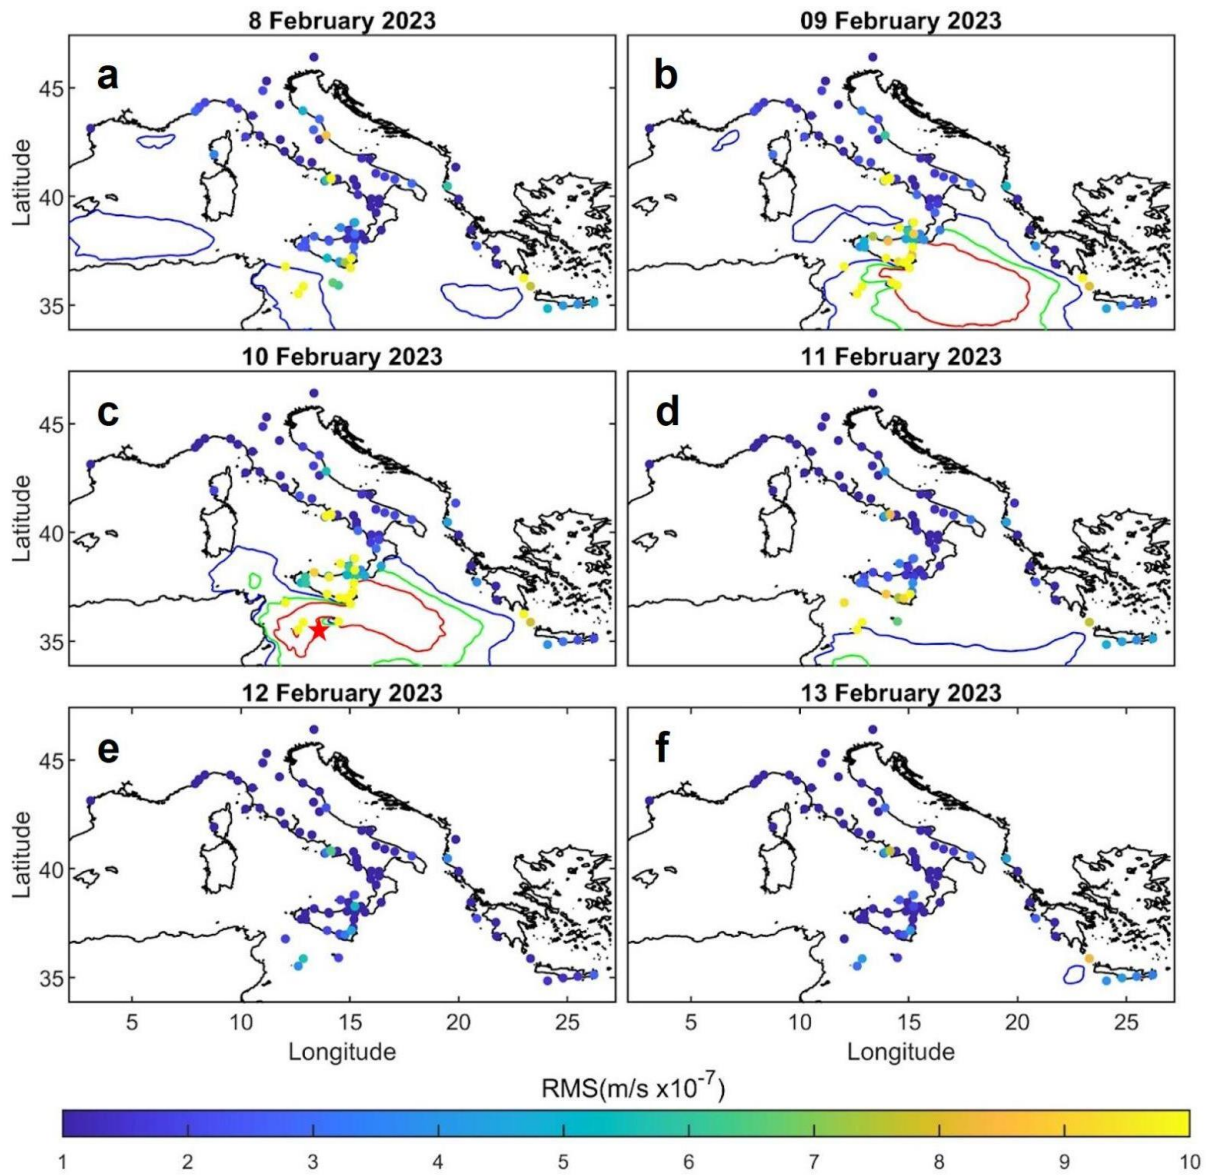

21

22 **Supplementary figure 4:** Spatial and temporal distribution of the RMS amplitude for the  
 23 SPSM band computed at 105 stations considered (dots). The colors of dots represent the RMS  
 24 amplitude as specified in the color bar. The blue, green and red contour lines represent  
 25 significant wave heights of 3, 4 and 5 m, respectively, while the red five-point star in (c)  
 26 indicates the eye position of the sub-tropical system Helios obtained from satellite images.

27

28

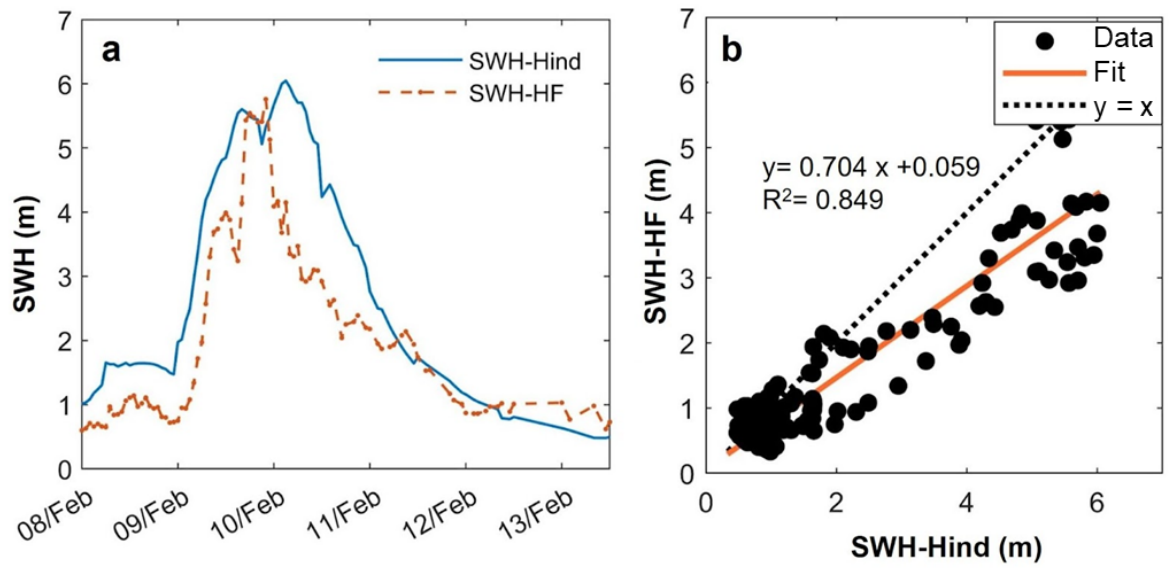

29

30 **Supplementary Figure 5:** (a) Comparison between the SWH time series retrieved from  
 31 hindcast data (SWH-Hind; light-blue line) and from HF Radar data (SWH-HF; orange dashed  
 32 line). (b) Crossplot showing the agreement between SWH-Hind and SWH-HF data with a  $R^2$   
 33 of 0.849. For the HF Radar location see **Figure 2c**.

34

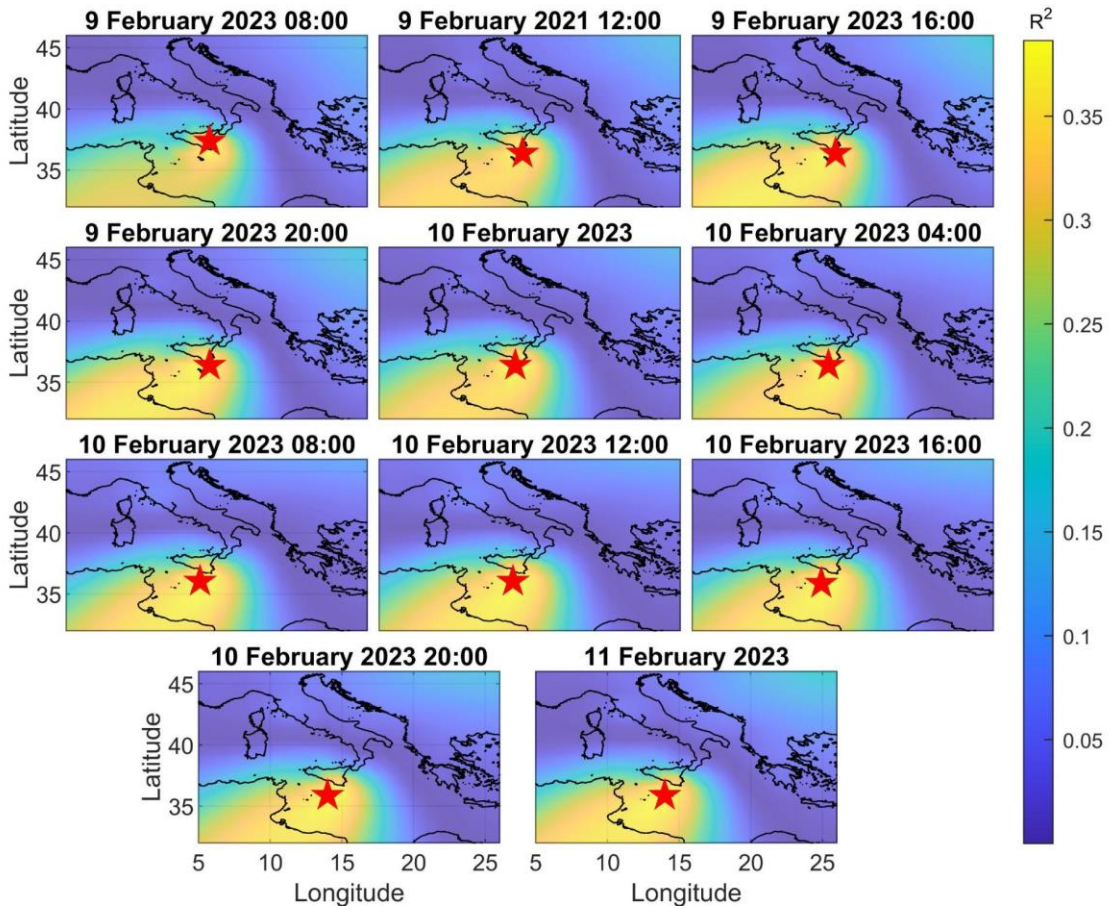

35

36 **Supplementary Figure 6:** Spatial distribution of  $R^2$  values during the entire period when we  
 37 obtained reliable locations. The red five-point star indicates the centroid position of all the grid  
 38 nodes whose  $R^2$  values do not differ by more than 1% from the maximum  $R^2$  value.

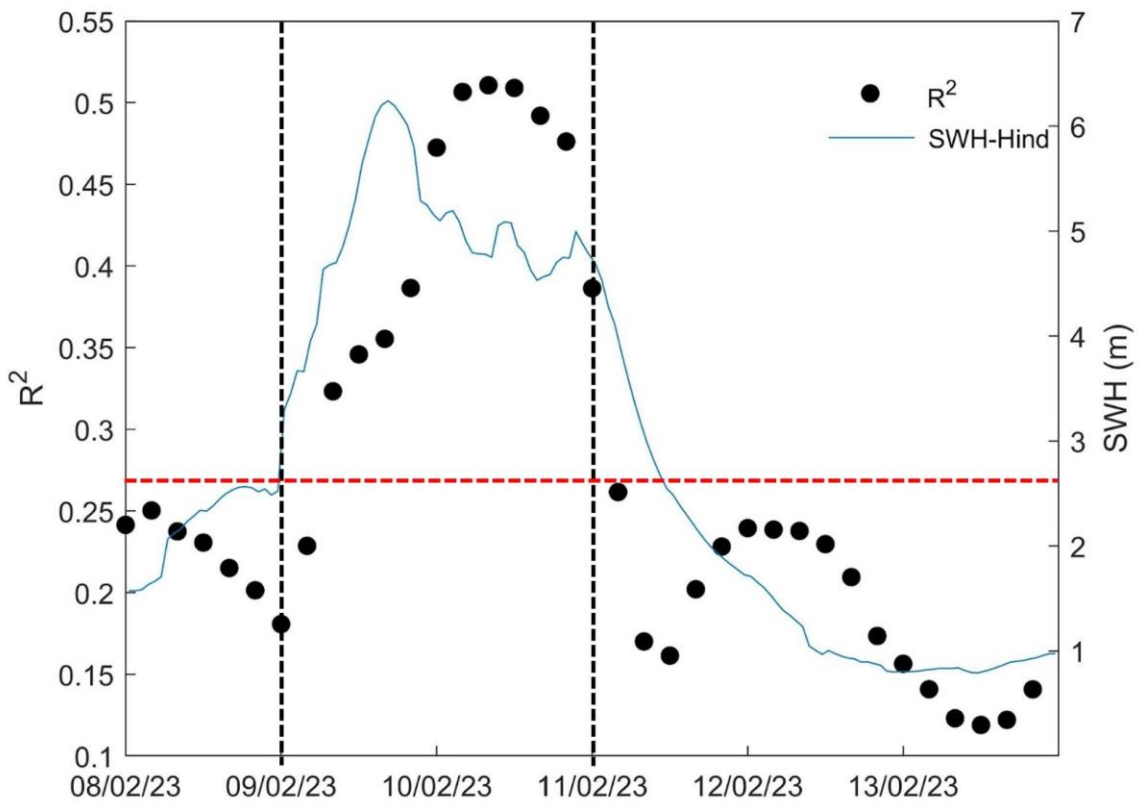

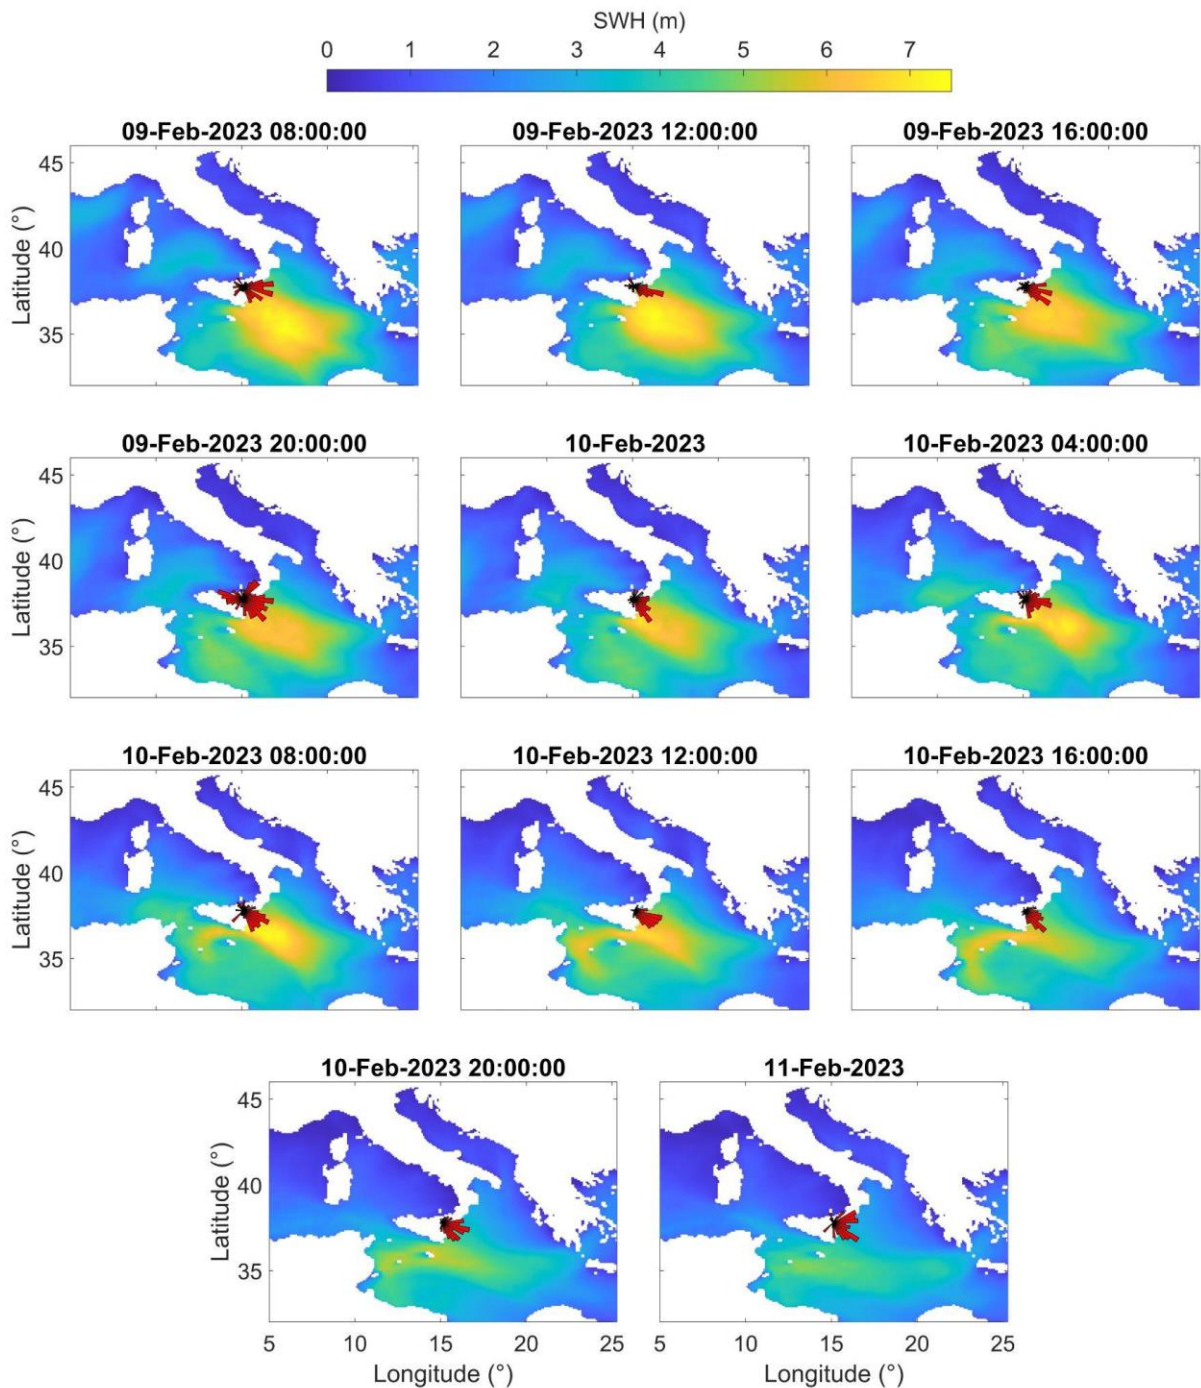

45

46 **Supplementary Figure 8:** Hindcast maps showing the significant wave heights (in m) during  
 47 the entire period when we obtained reliable locations by the grid search method. The rose  
 48 diagram, located at the center of the Etna seismic permanent network (see **Figure 2b**), shows  
 49 the distribution of the back azimuth values computed by the f-k analysis for the PM frequency  
 50 band.



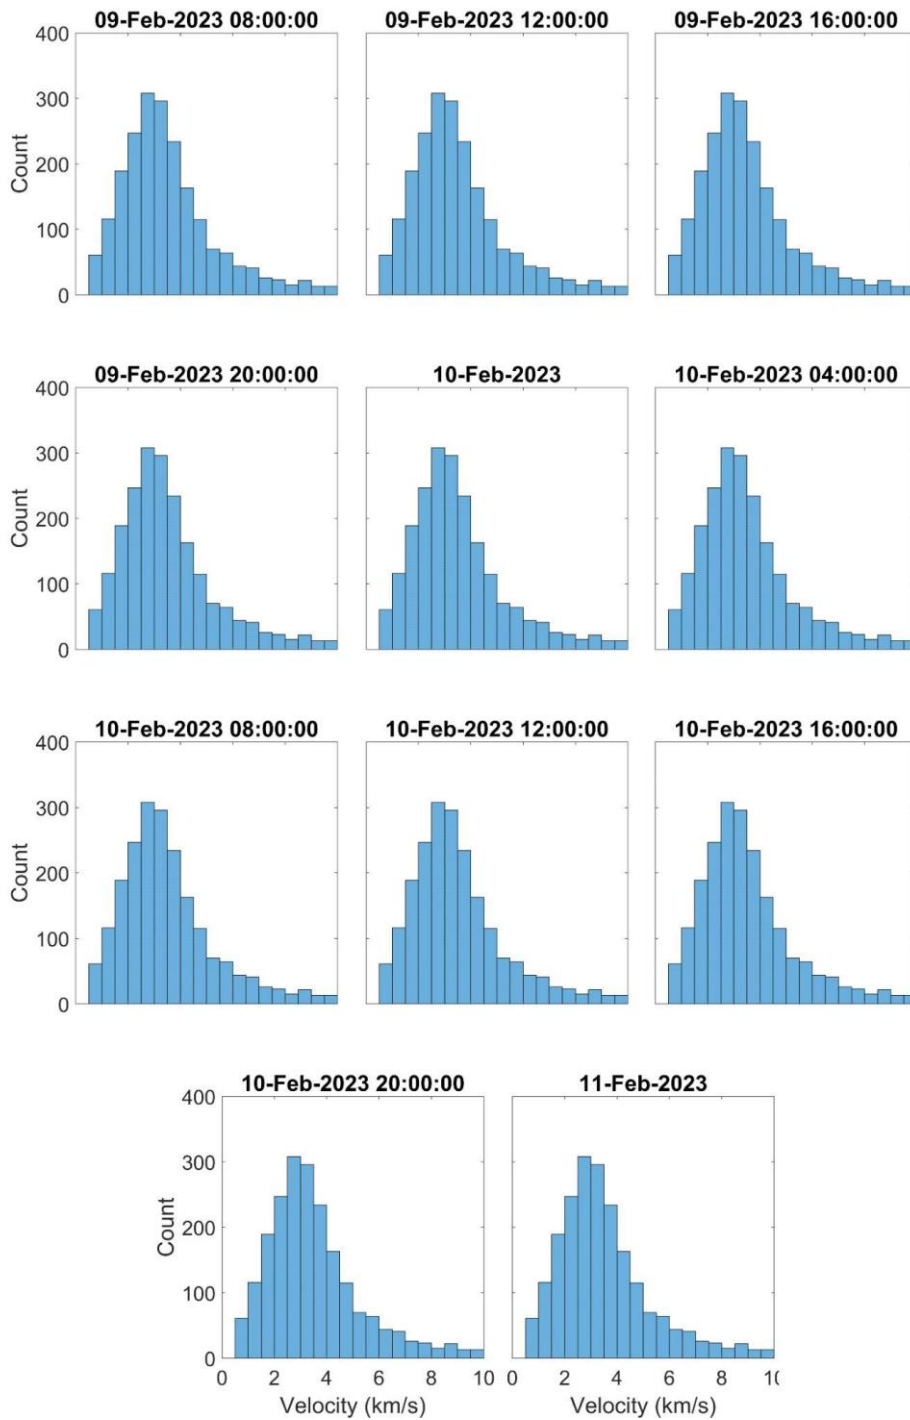

51

52 **Supplementary Figure 9:** Distribution of apparent velocity values computed by f-k analysis  
 53 for the PM frequency band. These values were calculated during the entire period when we  
 54 obtained reliable locations by the grid search method.

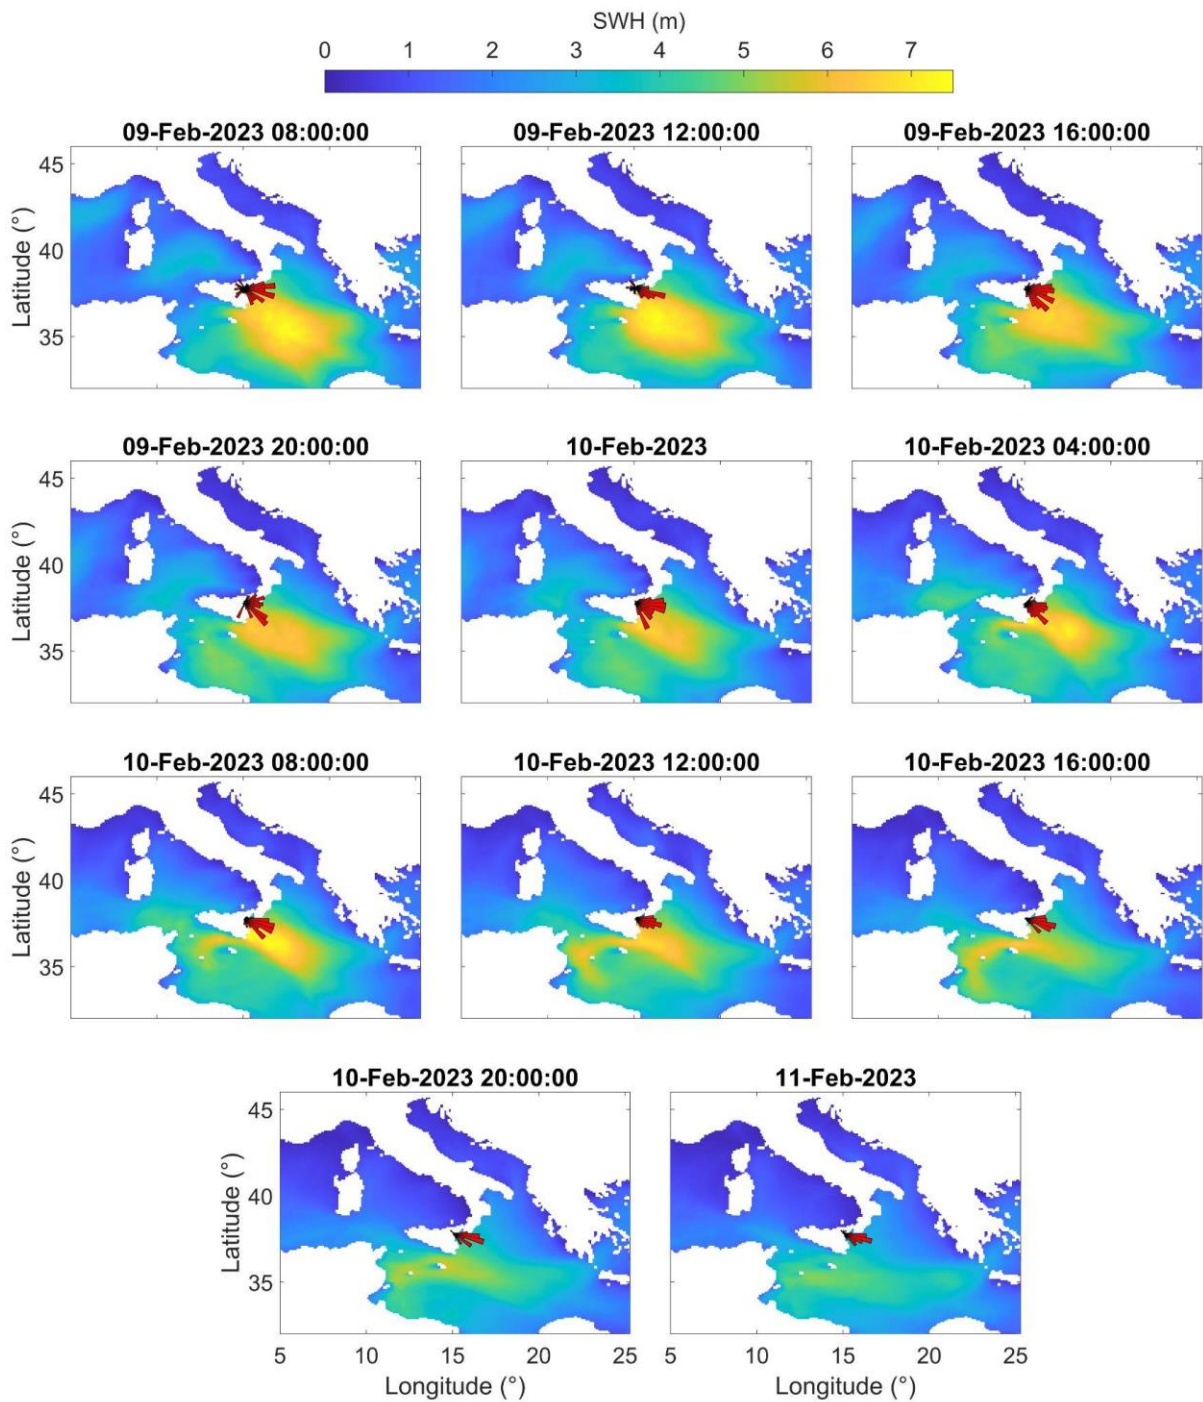

55

56 **Supplementary figure 10:** Hindcast maps showing the significant wave heights (in m) during  
 57 the entire period when we obtained reliable locations by the grid search method. The rose  
 58 diagram, located at the center of the Etna seismic permanent network (see **Figure 2b**), shows  
 59 the distribution of the back azimuth values computed by f-k analysis for the SM frequency  
 60 band.

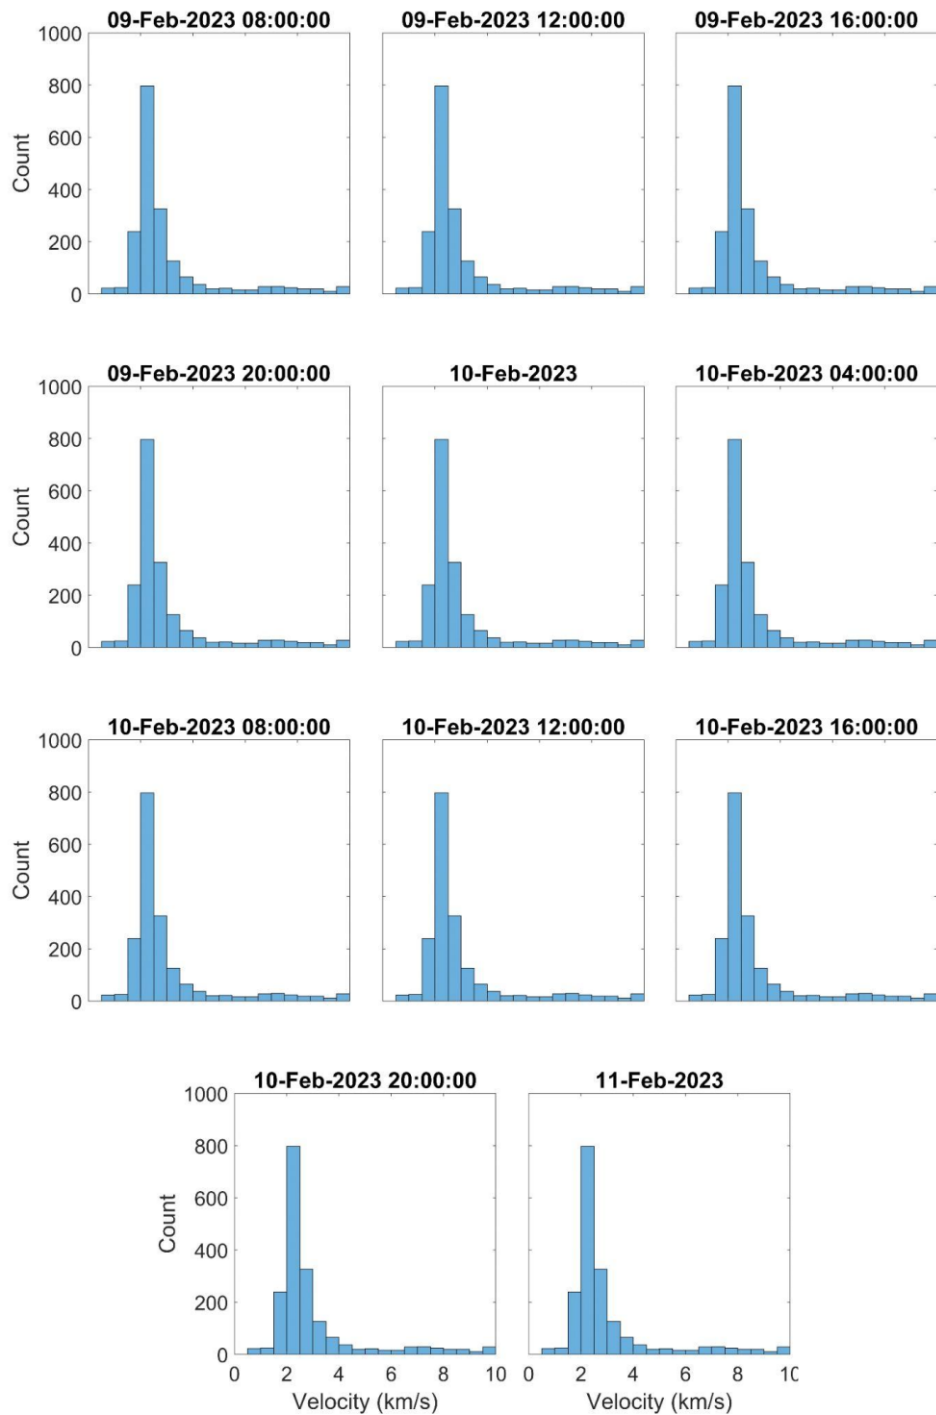

61

62 **Supplementary Figure 11:** Distribution of apparent velocity values computed by f-k analysis  
 63 for the SM frequency band. These values were calculated during the entire period when we  
 64 obtained reliable locations by the grid search method.

65

66

67 **Supplementary Tables**

68

69

70

| <b>N</b> | <b>Name</b> | <b>Latitude<br/>(degrees)</b> | <b>Longitude<br/>(degrees)</b> | <b>Altitude<br/>(m a.s.l.)</b> | <b>Sensor</b>             | <b>Network</b> |
|----------|-------------|-------------------------------|--------------------------------|--------------------------------|---------------------------|----------------|
| 1        | QLNO        | 44.32                         | 8.34                           | 547                            | NANOMETRICS TRILLIUM-40S  | IV             |
| 2        | MSSA        | 44.31                         | 9.51                           | 93                             | NANOMETRICS TRILLIUM-40S  | IV             |
| 3        | PLMA        | 44.05                         | 9.85                           | 22                             | NANOMETRICS TRILLIUM-240S | IV             |
| 4        | CELB        | 42.74                         | 10.21                          | 742                            | NANOMETRICS TRILLIUM-40S  | IV             |
| 5        | CASP        | 42.79                         | 10.86                          | 390                            | NANOMETRICS TRILLIUM-40S  | IV             |
| 6        | LATE        | 42.61                         | 11.80                          | 610                            | NANOMETRICS TRILLIUM-40S  | IV             |
| 7        | TOLF        | 42.06                         | 12.00                          | 371                            | NANOMETRICS TRILLIUM-40S  | IV             |
| 8        | LAV9        | 41.68                         | 12.69                          | 300                            | NANOMETRICS TRILLIUM-40S  | IV             |
| 9        | GIUL        | 41.56                         | 13.25                          | 566                            | NANOMETRICS TRILLIUM-40S  | IV             |
| 10       | MODR        | 41.14                         | 13.87                          | 345                            | NANOMETRICS TRILLIUM-40S  | IV             |
| 11       | IFOR        | 40.71                         | 13.85                          | 170                            | GURALP CMG-40T-60S        | IV             |
| 12       | IMTC        | 40.72                         | 13.87                          | 59                             | GURALP CMG-40T-60S        | IV             |
| 13       | IOCA        | 40.74                         | 13.90                          | 123                            | GURALP CMG-40T-60S        | IV             |
| 14       | CFMN        | 40.83                         | 14.09                          | 59                             | GURALP CMG-3ESPC-120S     | IV             |
| 15       | CPOZ        | 40.82                         | 14.11                          | 2                              | GURALP CMG-40T-60S        | IV             |
| 16       | COLB        | 40.82                         | 14.14                          | 22                             | GURALP CMG-40T-60S        | IV             |
| 17       | VTIR        | 40.80                         | 14.42                          | 612                            | GURALP CMG-40T-60S        | IV             |
| 18       | MCRV        | 40.78                         | 15.16                          | 1191                           | NANOMETRICS TRILLIUM-40S  | IV             |
| 19       | CDRU        | 40.49                         | 15.30                          | 1057                           | NANOMETRICS TRILLIUM-40S  | IV             |

|    |      |       |       |      |                           |    |
|----|------|-------|-------|------|---------------------------|----|
| 20 | CMPR | 40.32 | 15.30 | 732  | NANOMETRICS TRILLIUM-40S  | IV |
| 21 | BULG | 40.08 | 15.37 | 815  | NANOMETRICS TRILLIUM-40S  | IV |
| 22 | CET2 | 39.53 | 15.95 | 675  | NANOMETRICS TRILLIUM-40S  | IV |
| 23 | CAR1 | 39.25 | 16.21 | 680  | NANOMETRICS TRILLIUM-40S  | IV |
| 24 | JOPP | 38.60 | 15.88 | 500  | NANOMETRICS TRILLIUM-40S  | IV |
| 25 | MTTG | 38.00 | 15.69 | 484  | NANOMETRICS TRILLIUM-40S  | IV |
| 26 | IST3 | 38.79 | 15.23 | 255  | NANOMETRICS TRILLIUM-40S  | IV |
| 27 | ISTR | 38.78 | 15.19 | 103  | NANOMETRICS TRILLIUM-40S  | IV |
| 28 | IACL | 38.53 | 14.35 | 145  | NANOMETRICS TRILLIUM-40S  | IV |
| 29 | IFIL | 38.56 | 14.57 | 277  | NANOMETRICS TRILLIUM-40S  | IV |
| 30 | ILOS | 38.44 | 14.94 | 283  | NANOMETRICS TRILLIUM-40S  | IV |
| 31 | IVPL | 38.37 | 14.98 | 486  | NANOMETRICS TRILLIUM-40S  | IV |
| 32 | PII  | 43.72 | 10.52 | 66   | NANOMETRICS TRILLIUM-120S | IV |
| 33 | MMN  | 39.89 | 15.99 | 921  | NANOMETRICS TRILLIUM-40S  | IV |
| 34 | TDS  | 39.66 | 16.33 | 244  | NANOMETRICS TRILLIUM-120C | IV |
| 35 | DGI  | 40.31 | 9.606 | 354  | NANOMETRICS TRILLIUM-40S  | IV |
| 36 | SSY  | 37.15 | 15.07 | 600  | NANOMETRICS TRILLIUM-40S  | IV |
| 37 | MPG  | 38.16 | 13.36 | 600  | LENNARTZ LE3D-20S         | IV |
| 38 | GIB  | 37.99 | 14.02 | 1020 | NANOMETRICS TRILLIUM-120S | IV |
| 39 | PLAC | 38.44 | 16.43 | 602  | NANOMETRICS TRILLIUM-40S  | IV |
| 40 | SALB | 39.87 | 16.34 | 1000 | NANOMETRICS TRILLIUM-40S  | IV |
| 41 | MESG | 40.58 | 17.85 | 78   | NANOMETRICS TRILLIUM-40S  | IV |
| 42 | NOCI | 40.78 | 17.06 | 420  | NANOMETRICS TRILLIUM-40S  | IV |
| 43 | AMUR | 40.90 | 16.60 | 443  | NANOMETRICS TRILLIUM-40S  | IV |
| 44 | MRVN | 41.06 | 16.19 | 610  | NANOMETRICS TRILLIUM-40S  | IV |
| 45 | CAPA | 41.15 | 15.81 | 156  | NANOMETRICS TRILLIUM-120C | IV |
| 46 | MSAG | 41.71 | 15.90 | 890  | NANOMETRICS TRILLIUM-40S  | IV |
| 47 | APRC | 41.75 | 15.54 | 672  | NANOMETRICS TRILLIUM-120C | IV |

|    |      |       |       |      |                           |    |
|----|------|-------|-------|------|---------------------------|----|
| 48 | FRES | 41.97 | 14.66 | 414  | NANOMETRICS TRILLIUM-40S  | IV |
| 49 | TERO | 42.62 | 13.60 | 673  | NANOMETRICS TRILLIUM-40S  | IV |
| 50 | TRTR | 42.80 | 13.91 | 160  | NANOMETRICS TRILLIUM-40S  | IV |
| 51 | GUMA | 43.06 | 13.33 | 574  | NANOMETRICS TRILLIUM-120S | IV |
| 52 | AOI  | 43.55 | 13.60 | 530  | NANOMETRICS TRILLIUM-40S  | IV |
| 53 | PESA | 43.94 | 12.84 | 221  | NANOMETRICS TRILLIUM-40S  | IV |
| 54 | BRIS | 44.22 | 11.76 | 260  | NANOMETRICS TRILLIUM-120S | IV |
| 55 | CAVE | 44.86 | 11.00 | 18   | NANOMETRICS TRILLIUM-120S | IV |
| 56 | TEOL | 45.36 | 11.67 | 370  | NANOMETRICS TRILLIUM-120S | IV |
| 57 | STAL | 46.26 | 12.71 | 625  | NANOMETRICS TRILLIUM-120S | IV |
| 58 | OPPE | 45.30 | 11.17 | 20   | NANOMETRICS TRILLIUM-40S  | IV |
| 59 | PTCC | 46.40 | 13.35 | 700  | NANOMETRICS TRILLIUM-40S  | IV |
| 60 | AGLI | 41.12 | 9.173 | 180  | NANOMETRICS TRILLIUM-40S  | IV |
| 61 | CAVT | 37.67 | 12.75 | 158  | GURALP CMG-3EX            | IV |
| 62 | MMGO | 37.66 | 12.97 | 397  | NANOMETRICS TRILLIUM-120C | IV |
| 63 | CLTA | 37.15 | 13.96 | 246  | NANOMETRICS TRILLIUM-40S  | IV |
| 64 | HPAC | 36.70 | 15.03 | 70   | NANOMETRICS TRILLIUM-40S  | IV |
| 65 | HAGA | 37.28 | 15.15 | 126  | NANOMETRICS TRILLIUM-40S  | IV |
| 66 | EPOZ | 37.67 | 15.18 | 124  | GURALP CMG-3EX            | IV |
| 67 | MBFT | 37.94 | 12.95 | 520  | NANOMETRICS TRILLIUM-120S | IV |
| 68 | CSLB | 37.93 | 14.05 | 583  | NANOMETRICS TRILLIUM-120S | IV |
| 69 | MUCR | 38.04 | 14.87 | 1042 | NANOMETRICS TRILLIUM-40S  | IV |
| 70 | MILZ | 38.27 | 15.23 | 0    | NANOMETRICS TRILLIUM-40S  | IV |
| 71 | MPNC | 38.14 | 15.35 | 479  | NANOMETRICS TRILLIUM-40S  | IV |
| 72 | MSRU | 38.26 | 15.50 | 408  | NANOMETRICS TRILLIUM-40S  | IV |
| 73 | AIO  | 37.97 | 15.23 | 751  | NANOMETRICS TRILLIUM-40S  | IV |
| 74 | IMI  | 43.91 | 7.893 | 840  | NANOMETRICS TRILLIUM-40S  | IV |
| 75 | RORO | 44.11 | 8.066 | 246  | NANOMETRICS TRILLIUM-40S  | IV |

|    |      |       |       |     |                                                    |    |
|----|------|-------|-------|-----|----------------------------------------------------|----|
| 76 | AJAC | 41.93 | 8.76  | 27  | CMG3-ESPC broad band triaxial sensor by Guralp     | FR |
| 77 | CLAF | 43.13 | 3.09  | 115 | CMG3-ESP broad band triaxial sensor by Guralp      | FR |
| 78 | PYL  | 36.89 | 21.74 | 226 | Trillium 40, 40 s, 1553 V/m/s-Trident, 16 vpp      | HP |
| 79 | AMT  | 37.53 | 21.70 | 482 | Trillium 40, 40 s, 1553 V/m/s-Trident, 16 vpp      | HP |
| 80 | KNDR | 35.23 | 23.62 | 13  | CMG-3ESP, 120 s, 2000 V/m/s-RT130                  | HC |
| 81 | LTHK | 37.70 | 20.83 | 35  | CMG-3T, 120 s, 1500 V/m/s-Trident, 40 Vpp          | HP |
| 82 | KTHA | 36.25 | 23.06 | 360 | STS-2, 120 s, 1500 V/m/s, generation 3 electronics | HL |
| 83 | VLO  | 40.46 | 19.49 | 80  | NANOMETRICS TRILLIUM-40S                           | AC |
| 84 | PZIN | 36.81 | 11.97 | 205 | NANOMETRICS TRILLIUM-40S                           | IV |
| 85 | LPDG | 35.51 | 12.63 | 50  | NANOMETRICS TRILLIUM-40S                           | IV |
| 86 | ANKY | 35.86 | 23.30 | 143 | CMG-3ESP, 60 s, 2000 V/m/s-PS6-24                  | HL |
| 87 | KTHR | 36.24 | 22.99 | 270 | CMG-3ESP, 120 s, 2000 V/m/s-DM-24 Mk3              | HC |
| 88 | GVD  | 34.83 | 24.08 | 170 | STS-2, 120 s, 1500 V/m/s                           | HL |
| 89 | PFKS | 35.04 | 25.47 | 745 | CMG-3ESP, 120 s, 2000 V/m/s-RT130                  | HC |
| 90 | TIR  | 41.34 | 19.86 | 247 | STRECKEISEN STS-1H-VBB                             | MN |
| 91 | FSK  | 38.45 | 20.56 | 113 | CMG-3T, 120 s, 1500 V/m/s-DM-24 Mk2                | HP |
| 92 | IMOD | 34.97 | 24.79 | 243 | CMG-3ESP, 120 s, 2000 V/m/s-RT130                  | HC |
| 93 | ZKR  | 35.11 | 26.21 | 254 | STS-2, 120 s, 1500 V/m/s                           | HL |
| 94 | PGHD | 36.77 | 12.04 | 331 | NANOMETRICS TRILLIUM-40S                           | IV |
| 95 | HMDC | 36.96 | 14.78 | 600 | NANOMETRICS TRILLIUM-40S                           | IV |
| 96 | HVIT | 36.99 | 14.52 | 296 | GURALP CMG-3EX                                     | IV |

|     |       |       |       |     |                           |    |
|-----|-------|-------|-------|-----|---------------------------|----|
| 97  | SRN   | 39.88 | 20.00 | 20  | NANOMETRICS TRILLIUM-40S  | AC |
| 99  | WDD   | 35.83 | 14.52 | 15  | STRECKEISEN STS-2-120S    | MN |
| 100 | LINA  | 35.86 | 12.86 | 70  | NANOMETRICS TRILLIUM-40S  | IV |
| 101 | MSDA  | 35.90 | 14.48 | 48  | NANOMETRICS TRILLIUM-120S | ML |
| 102 | XLND  | 36.03 | 14.22 | 6   | NANOMETRICS TRILLIUM-120S | ML |
| 103 | IWAV5 | 36.72 | 14.83 | 18  | CERTIMUS - GURALP         |    |
| 104 | IWAV3 | 36.87 | 14.44 | 47  | CERTIMUS - GURALP         |    |
| 105 | IWAV2 | 36.92 | 14.68 | 607 | CERTIMUS - GURALP         |    |

71

72 **Supplementary table 1.** List of stations used for the spectral analysis and in the grid search

73 method and their features in terms of locations and sensor type.

74

75

76

| <b>N</b> | <b>Name</b> | <b>Longitude<br/>(degrees)</b> | <b>Latitude<br/>(degrees)</b> | <b>Altitude<br/>(m a.s.l.)</b> | <b>Sensor</b>            |
|----------|-------------|--------------------------------|-------------------------------|--------------------------------|--------------------------|
| 1        | EPLC        | 14.9857                        | 37.7651                       | 2917                           | Nanometrics Trillium 40S |
| 2        | ESVO        | 14.9469                        | 37.7731                       | 1691                           | Nanometrics Trillium 40S |



|    |      |         |         |      |                          |
|----|------|---------|---------|------|--------------------------|
| 3  | ESPC | 15.0274 | 37.6925 | 1610 | Nanometrics Trillium 40S |
| 4  | ESLN | 14.9744 | 37.6934 | 1735 | Nanometrics Trillium 40S |
| 5  | EPIT | 15.0567 | 37.8113 | 1586 | Nanometrics Trillium 40S |
| 6  | EPDN | 15.0168 | 37.7659 | 2823 | Nanometrics Trillium 40S |
| 7  | EMPL | 14.9703 | 37.6790 | 1438 | Nanometrics Trillium 40S |
| 8  | EMFO | 15.0902 | 37.7357 | 1163 | Nanometrics Trillium 40S |
| 9  | ECZM | 14.9041 | 37.7313 | 1346 | Nanometrics Trillium 40S |
| 10 | ECPN | 14.9865 | 37.7437 | 2996 | Nanometrics Trillium 40S |
| 11 | ECNE | 15.0018 | 37.7653 | 2901 | Nanometrics Trillium 40S |
| 12 | ECBD | 15.0865 | 37.7802 | 1419 | Nanometrics Trillium 40S |
| 13 | EMNR | 15.0260 | 37.8168 | 1797 | Nanometrics Trillium 40S |

|    |      |         |         |      |                          |
|----|------|---------|---------|------|--------------------------|
| 14 | EMSG | 14.9495 | 37.8215 | 1435 | Nanometrics Trillium 40S |
| 15 | EMFS | 14.9979 | 37.7196 | 2507 | Nanometrics Trillium 40S |

77 **Supplementary table 2.** List of stations used in the array method and their features in terms

78 of locations and sensor type.

79
