# Supplementary material for: Integration of microseism, wavemeter buoy, HF Radar and hindcast data to analyze the Mediterranean cyclone Helios
Source: Copernicus journal article supplement (doi:10.5194/egusphere-2023-1212), 2023-06-19
Supplement: Supplementary file [file egusphere-2023-1212-AC2-supplement.pdf]

**Dear Reviewer;**

*Thank you for your comments on our manuscript titled “**Integration of microseism, wavemeter buoy, HF Radar and hindcast data to analyze the Mediterranean cyclone Helios**”. We have taken great care to address all the comments. The detailed one-by-one response to the comments is included below (the review itself is in black, and our responses are in blue). Please note that the line numbers refer to the manuscript with the tracked revisions.*

**Reviewer 2**

1. There are too many references in the paper, so it is suggested that the author focus more on the relevant references of the research content and delete irrelevant parts.

Since in this work we deal with both seismology and meteorology, considering in particular Medicanes, it is essential to introduce these two aspects by analyzing and citing the existent literature. Also the performed analysis requires a citation of the existing literature. The number of our references is in line with the limit imposed by several journals (70-80). For these reasons, we think that the number of references is appropriate for our research.

2. It is recommended to describe the data and then give the main purpose of the data.

We provide a detailed description of the data used in this study in section 3. In particular, we described the seismic data in section 3.1 and the analysis performed using this data in lines: 173-174, 182. Similarly, Sea state data are described in sections: 3.2 (overview of the sea state data used in this study), 3.2.1 (Hindcast maps), 3.2.2 (wavemeter buoy), 3.2.3 (HF Radar) and 3.2.4 (Satellite data).

3. Part 3.3 only introduces what the figure shows, and does not specifically analyze the details and possible reasons of the figure pattern.

In section 3 (Data and methods) we present only the data and methods used in our study; a detailed description of all the figures cited in this section is given in section 4 (Result and discussion). In particular, the figures cited in section 3.3 are discussed in section 4.2.

4. The black solid line in Figure 3 is not only indicated in the text, but also suggested in the figure illustration.

Fixed. We added what the black lines represent both in the text (lines 249 and 393) and in Figure 3.
